# Supplementary material for: Dynamic modeling of syngas fermentation in a continuous stirred‐tank reactor: Multi‐response parameter estimation and process optimization
Source: PubMed Central journal article supplement (PMC9328424; doi:10.1002/bit.27108), 2019-07-24
Supplement: BIT-116-2473-s001.pdf [file BIT-116-2473-s001.pdf]

## SUPPLEMENTARY MATERIALS

### Dynamic modeling of syngas fermentation in a continuous stirred tank reactor: multi-response parameter estimation and process optimization

Elisa M. de Medeiros<sup>1,2</sup>, John A. Posada<sup>1</sup>, Henk Noorman<sup>1,3</sup>, Rubens Maciel Filho<sup>2</sup>

<sup>1</sup> Department of Biotechnology, Delft University of Technology, van der Maasweg 9, 2629 HZ, Delft, The Netherlands

<sup>2</sup> School of Chemical Engineering, University of Campinas (UNICAMP), Av. Albert Einstein 500, 13084-852, Campinas, SP, Brazil

<sup>3</sup> DSM Biotechnology Center, PO Box 1, 2600 MA Delft, The Netherlands

#### Corresponding author

Elisa M. de Medeiros, E-mail: E.MagalhaesdeMedeiros@tudelft.nl

#### Lag-phase

The uptake rates of CO and H<sub>2</sub> were multiplied by a lag-phase term when the experimental data suggested such behavior. This was done only for the dynamic case study C1, in which the uptake rates  $v_j$  ( $j = \text{CO}, \text{H}_2$ ) were multiplied by  $I_{lag}$  as described in Eq. (S1), to simulate lag-phase behavior during the first 150 hours of fermentation.

$$I_{lag} = \left(1 + \exp(-0.15 \cdot (t - 150))\right)^{-1} \quad (\text{S1})$$

**Table S1.** Species properties for gas-liquid equilibrium and mass transfer coefficients.

|                      | CO                    | H <sub>2</sub>        | CO <sub>2</sub>       | EtOH                  | HAc                   | H <sub>2</sub> O      |
|----------------------|-----------------------|-----------------------|-----------------------|-----------------------|-----------------------|-----------------------|
| $H_j^\dagger$        | 4.972×10 <sup>9</sup> | 6.692×10 <sup>9</sup> | 1.205×10 <sup>8</sup> | -                     | -                     | -                     |
| $P_{sat,j}^\ddagger$ | -                     | -                     | -                     | 1.523×10 <sup>4</sup> | 4.047×10 <sup>3</sup> | 6.260×10 <sup>3</sup> |
| $\gamma_j^\infty^\S$ | -                     | -                     | -                     | 7.6                   | 3.5                   | -                     |
| $Df_i^\P$            | 2.03×10 <sup>-5</sup> | 4.50×10 <sup>-5</sup> | 1.92×10 <sup>-5</sup> | 0.84×10 <sup>-5</sup> | 0.99×10 <sup>-5</sup> | -                     |

<sup>†</sup> Henry constants (Pa) in water at 36°C calculated with the correlations reported in Sander (1999).

<sup>‡</sup> Vapor pressure (Pa) at 36°C calculated with Antoine equation.

<sup>§</sup> Activity coefficients at infinite dilution in water predicted with UNIFAC model using Aspen Plus.

<sup>¶</sup> Mass diffusivity (cm<sup>2</sup>.s<sup>-1</sup>) in liquid water at 25°C from Cussler (1997). Since for a species  $i$  the relationship  $Df_i \cdot \mu_{\text{H}_2\text{O}} / T$  is constant (Perry and Green, 1999), it can be shown that the relationship  $Df_i / Df_{air}$  is also constant with temperature. The mass diffusivity of air in water at 25°C is 2·10<sup>-5</sup> cm<sup>2</sup>.s<sup>-1</sup>.

**Table S2.** Bounds used in parameter estimation.

| Parameter $\beta_k$  | Unit                                  | Lower Bound | Upper Bound |
|----------------------|---------------------------------------|-------------|-------------|
| $V_{\max,CO}$        | mmol.g <sup>-1</sup> .h <sup>-1</sup> | 15          | 60          |
| $V_{\max,H_2}$       | mmol.g <sup>-1</sup> .h <sup>-1</sup> | 15          | 60          |
| $K_{S,CO}$           | mmol.L <sup>-1</sup>                  | 0.001       | 0.9         |
| $K_{S,H_2}$          | mmol.L <sup>-1</sup>                  | 0.001       | 0.9         |
| $K_{I,EtOH}$         | mmol.L <sup>-1</sup>                  | 100         | 1000        |
| $K_{I,HAc}$          | mmol.L <sup>-1</sup>                  | 100         | 1000        |
| $K_{I,CO}$           | mmol.L <sup>-1</sup>                  | 0.1         | 1           |
| $Y_{CO,X}$           | g.mol <sup>-1</sup>                   | 0.1         | 3           |
| $Y_{H_2,X}$          | g.mol <sup>-1</sup>                   | 0.1         | 3           |
| $v_{\max,AcR}^{CO}$  | mmol.g <sup>-1</sup> .h <sup>-1</sup> | 1           | 50          |
| $K_{S,AcR}^{CO}$     | mmol.L <sup>-1</sup>                  | 20          | 600         |
| $v_{\max,AcR}^{H_2}$ | mmol.g <sup>-1</sup> .h <sup>-1</sup> | 1           | 50          |
| $K_{S,AcR}^{H_2}$    | mmol.L <sup>-1</sup>                  | 20          | 600         |
| $k_d$                | h <sup>-1</sup>                       | 0.001       | 0.05        |
| $f_0$                | -                                     | 0.1         | 1           |

**Table S3.** Bounds used in the optimization of ethanol productivity and CO conversion.

| Parameter $\beta_k$  | Unit                                  | Lower Bound | Upper Bound |
|----------------------|---------------------------------------|-------------|-------------|
| $GRT$                | min                                   | 5           | 50          |
| $D_{rate}$           | h <sup>-1</sup>                       | 0.005       | 0.2         |
| $XP$                 | -                                     | 0.1         | 1           |
| $H_2:CO$             | -                                     | 0           | 3           |
| $V_{\max,CO}$        | mmol.g <sup>-1</sup> .h <sup>-1</sup> | 35          | 50          |
| $V_{\max,H_2}$       | mmol.g <sup>-1</sup> .h <sup>-1</sup> | 25          | 40          |
| $Y_{X,CO}$           | g.mol <sup>-1</sup>                   | 0.6         | 2.5         |
| $Y_{X,H_2}$          | g.mol <sup>-1</sup>                   | 0.1         | 0.3         |
| $v_{\max,AcR}^{CO}$  | mmol.g <sup>-1</sup> .h <sup>-1</sup> | 20          | 50          |
| $K_{S,AcR}^{CO}$     | mmol.L <sup>-1</sup>                  | 300         | 500         |
| $v_{\max,AcR}^{H_2}$ | mmol.g <sup>-1</sup> .h <sup>-1</sup> | 1           | 30          |
| $K_{S,AcR}^{H_2}$    | mmol.L <sup>-1</sup>                  | 300         | 600         |
| $k_d$                | h <sup>-1</sup>                       | 0.005       | 0.01        |

## Bounded Simplex Algorithm

As explained in the main text, the estimated parameters presented in this study were obtained using Genetic Algorithm, but the derivative-free method Simplex was also used for deepening . The MATLAB function *fminsearch* applies Simplex Algorithm for unconstrained multi-variable problems, but in the present study the parameters are constrained as shown in Table S2. In order to use this method with constraints on the optimization variables, the vector of constrained parameters being estimated  $\hat{\underline{\beta}}$  must be transformed into a new vector of unconstrained parameters  $\underline{\omega}$ , whose individual elements  $\omega_k$  are computed with Eq. (S2) from a given initial estimate  $\hat{\underline{\beta}}$ , where  $LB_k$  and  $UB_k$  are the lower and upper bounds pre-established for parameter  $\hat{\beta}_k$ . Then, during the Simplex search, the subroutine that receives the unconstrained parameters and generates the responses  $\hat{y}_j$  in each iteration, receives the new unconstrained vector  $\underline{\omega}$  and converts it back to  $\underline{LB} \leq \hat{\underline{\beta}} \leq \underline{UB}$  via Eq. (S3) so that the right-hand side of the ODE system may be computed with  $\hat{\underline{\beta}}$  in the appropriate range of values, allowing to obtain  $\hat{y}_j$ .

$$\omega_k = \left( \frac{\hat{\beta}_k - LB_k}{UB_k - \hat{\beta}_k} \right)^{1/2} \quad (S2)$$

$$\frac{\hat{\beta}_k - LB_k}{UB_k - LB_k} = \frac{\omega_k^2}{\omega_k^2 + 1} \quad \Rightarrow \quad \hat{\beta}_k = LB_k + (UB_k - LB_k) \cdot \left( \frac{\omega_k^2}{\omega_k^2 + 1} \right) \quad -\infty < \omega_k < +\infty \quad (S3)$$

## Statistical Analysis

With assumptions (A1), (A2), (A3) and Eqs. (30)-(31) from the main text, as well as the numerically estimated parameters  $\hat{\underline{\beta}}$  from the single-objective minimization (Eq. (32) from the main text), several statistical entities were calculated to check the goodness of the estimation and evaluate significance of parameters. The necessary statistical formulas are presented here with limited explanation (see Himmelblau, 1970). The main building block is the  $N_E \times N_P$  Jacobian matrix  $\underline{X}_j$  of responses  $j$  relative to parameters, from which the  $N_P \times N_P$  matrix  $[\underline{XWX}]$  is constructed as in Eq. (S4). Then the variance-covariance matrices of estimated parameters and predicted responses follow, respectively, in Eq. (S5).

$$[\underline{XWX}] = \sum_{j=1}^{N_E} \left( \underline{X}_j^T W_j \underline{X}_j \right) \quad (S4)$$

$$\underline{\underline{Cov}}(\underline{\hat{\beta}}) = \sigma_\varepsilon^2 [\underline{\underline{XWX}}]^{-1} \quad , \quad \underline{\underline{Cov}}(\underline{\hat{y}}_j) = \sigma_\varepsilon^2 \underline{\underline{X}}_j [\underline{\underline{XWX}}]^{-1} \underline{\underline{X}}_j^T \quad (\text{S5})$$

At the optimal  $\underline{\hat{\beta}}$  solution, it can be shown (Himmelblau, 1970) that the statistic  $S_R^2$  – the multi-response weighted sum of squared residuals given in Eq. (S6) – has several useful properties: (i) it corresponds to the optimum objective value in Eq. (32) (main text) divided by  $N_R \cdot N_E - N_P$ ; (ii) it is uncorrelated with  $\underline{\hat{\beta}}$ ; (iii) it is the best estimator (unbiased and coherent) of the fundamental variance  $\sigma_\varepsilon^2$ ; and (iv)  $S_R^2(N_R \cdot N_E - N_P) / \sigma_\varepsilon^2$  follows a chi-square ( $\chi^2$ ) PDF with  $N_R \cdot N_E - N_P$  degrees of freedom.  $S_R^2$  allows to obtain estimators of the variance-covariance matrices in Eq. (S5) as given in Eq. (S7). From Eq. (S7) one can extract estimators of standard deviations of estimated parameter  $\hat{\beta}_k$  and estimated response  $j$  at experiment  $i$ ,  $\hat{y}_{j,i}$ , as shown in Eq. (S8). Confidence intervals at 95% probability for true parameters and responses can be constructed as shown, respectively, in Eqs. (S9) and (S10), where  $t_{1-\alpha/2}$  is the abscissa at  $(1-\alpha/2) \cdot 100\%$  probability ( $\alpha=0.05$ ) of the t-Student PDF with  $N_R \cdot N_E - N_P$  degrees of freedom.

$$S_R^2 = \left( \frac{1}{N_R \cdot N_E - N_P} \right) \sum_{j=1}^{N_R} (\underline{y}_j - \underline{\hat{y}}_j)^T \underline{\underline{W}}_j (\underline{y}_j - \underline{\hat{y}}_j) \quad (\text{S6})$$

$$\underline{\underline{Cov}}(\underline{\hat{\beta}}) = S_R^2 [\underline{\underline{XWX}}]^{-1} \quad , \quad \underline{\underline{Cov}}(\underline{\hat{y}}_j) = S_R^2 \underline{\underline{X}}_j [\underline{\underline{XWX}}]^{-1} \underline{\underline{X}}_j^T \quad (\text{S7})$$

$$\hat{\sigma}_{\hat{\beta}_k} = \sqrt{[\underline{\underline{Cov}}(\underline{\hat{\beta}})]_{kk}} \quad , \quad \hat{\sigma}_{\hat{y}_{j,i}} = \sqrt{[\underline{\underline{Cov}}(\underline{\hat{y}}_j)]_{ii}} \quad (\text{S8})$$

$$\hat{\beta}_k - t_{1-\alpha/2} \cdot \hat{\sigma}_{\hat{\beta}_k} \leq \beta_k \leq \hat{\beta}_k + t_{1-\alpha/2} \cdot \hat{\sigma}_{\hat{\beta}_k} \quad (\text{S9})$$

$$\hat{y}_{j,i} - t_{1-\alpha/2} \cdot \hat{\sigma}_{\hat{y}_{j,i}} \leq \eta_{j,i} \leq \hat{y}_{j,i} + t_{1-\alpha/2} \cdot \hat{\sigma}_{\hat{y}_{j,i}} \quad (\text{S10})$$

The F-test to reject the null hypothesis (i.e. parameter  $\beta_k$  is significant) with 95% probability is given (Himmelblau, 1970) in Eq. (S11), where  $\phi_{1-\alpha}(I, N_R \cdot N_E - N_P)$  is the abscissa at  $(1-\alpha) \cdot 100\%$  probability ( $\alpha=0.05$ ) of the Fisher PDF with degrees of freedom  $(I, N_R \cdot N_E - N_P)$ .

$$R(\hat{\beta}_k) = \frac{(\hat{\beta}_k)^2}{(\hat{\sigma}_{\hat{\beta}_k})^2} > \phi_{1-\alpha}(I, N_R \cdot N_E - N_P) \Rightarrow \beta_k \neq 0 \quad (\text{S11})$$

**Table S4.** F-test score  $R_{\hat{\beta}_k}$  for the parameter estimates  $\hat{\beta}_k$  with 95% probability.

| Parameter                 | C1   | C2   | C3-A | C3-B | C3-C |
|---------------------------|------|------|------|------|------|
| $\phi_{1-\alpha}^\dagger$ | 3.93 | 3.90 | 4.10 | 4.10 | 4.10 |
| $V_{\max,CO}$             | 297  | 181  | 208  | 118  | 793  |
| $V_{\max,H_2}$            | 140  | 54.3 | 247  | 222  | 696  |
| $K_{S,CO}$                | 1293 | 13.0 | 188  | 67.8 | 306  |
| $K_{S,H_2}$               | 246  | 32.3 | 396  | 54.1 | 1163 |
| $K_{I,EtOH}$              | 123  | -    | -    | -    | -    |
| $K_{I,HAc}$               | 226  | 10.3 | 228  | 427  | 92.6 |
| $K_{I,CO}$                | 145  | 5.98 | 230  | 87.4 | 232  |
| $Y_{X,CO}$                | 126  | 137  | 88.3 | 70.6 | 265  |
| $Y_{X,H_2}$               | 293  | 24.5 | 158  | 185  | 1733 |
| $V_{\max,CO}^{AcR}$       | 285  | 17.7 | 431  | 424  | 788  |
| $K_{S,CO}^{AcR}$          | 1428 | 13.5 | 790  | 44.3 | 293  |
| $V_{\max,H_2}^{AcR}$      | 444  | 33.2 | 352  | 90.8 | 780  |
| $K_{S,H_2}^{AcR}$         | 613  | 16.3 | 487  | 137  | 351  |
| $k_d$                     | 2169 | 14.1 | 323  | 69.3 | 143  |
| $f_0$                     | 1786 | 31.1 | 414  | 65.5 | 263  |

$\dagger R_{\hat{\beta}_k} > \phi_{1-\alpha}$  for parameter significance where  $\phi_{1-\alpha}$  is the Fischer abscissa at 95% probability ( $\alpha = 0.05$ ) for degrees of freedom 1 and  $N_R \cdot N_E - N_P$ .

### Additional variables with time profile

Fig. S1 presents the profiles of variables that are model inputs but also change with time, for case study C1. The agitation rate ( $N$ ), inlet volumetric gas flow rate ( $Q_{G,in}$ ) and volumetric liquid flow rate ( $Q_{L,in}$ ) were obtained assuming linear profiles with time given the information provided in the article used as reference; and the mass transfer coefficient  $k_L a_{ref}$  was calculated as explained in the main text. The liquid volume is 1000 mL.

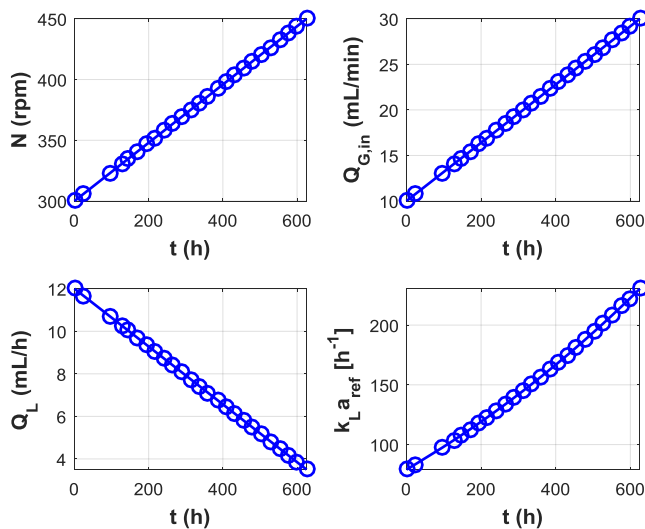

**Figure S1.** Dynamic profiles of agitation rate ( $N$ ), inlet volumetric gas flow rate ( $Q_{G,in}$ ), volumetric liquid flow rate ( $Q_{L,in}$ ) and calculated  $k_L a_{ref}$  in case study C1.

### Effects of the initial conditions on the steady-state

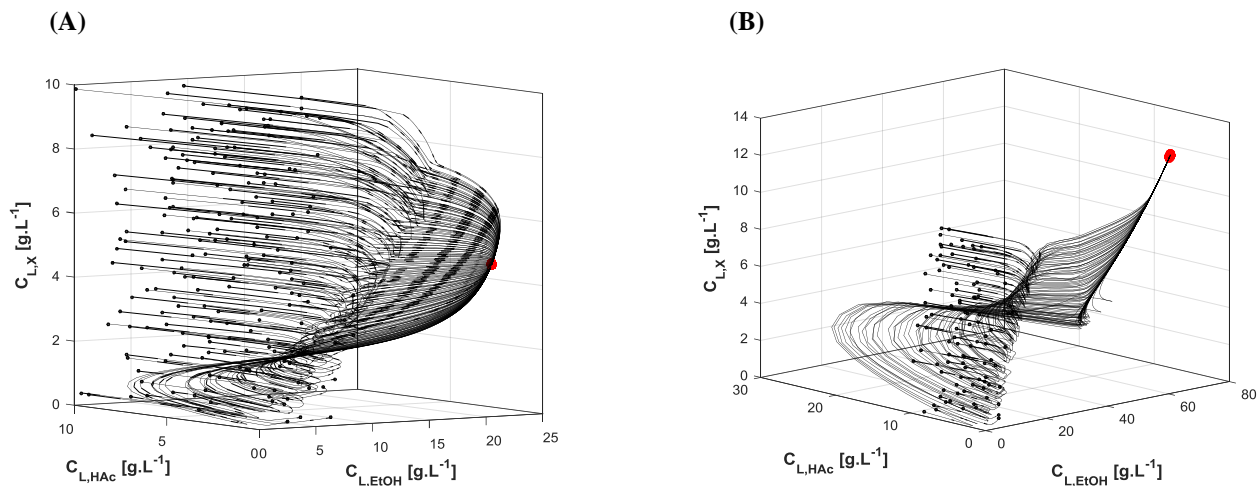

**Figure S2.** Phase portraits of ethanol, acetic acid and biomass concentrations with random perturbations on the initial conditions: dynamic trajectories (black solid lines), initial conditions (black spheres), steady states (red spheres). Operating conditions fixed at: (A)  $GRT = 50$  min and  $D_{rate} = 0.01$   $h^{-1}$ ; (B)  $GRT = 3.33$  min and  $D_{rate} = 0.01$   $h^{-1}$ .

## Effects of the agitation rate

(A)

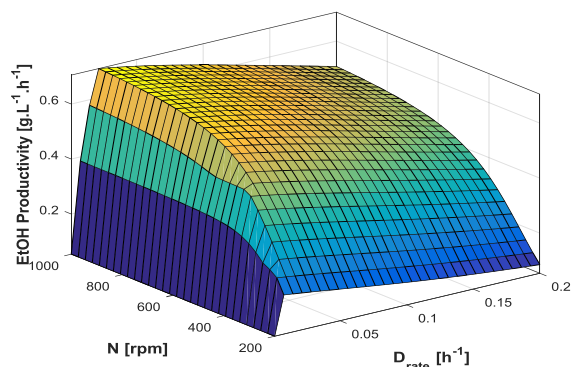

(B)

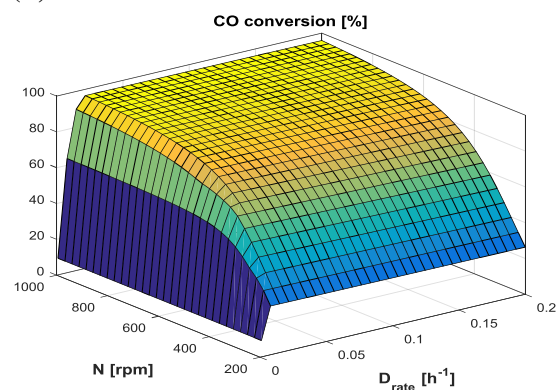

(C)

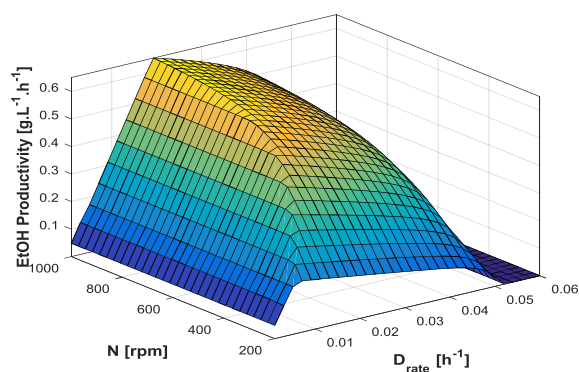

(D)

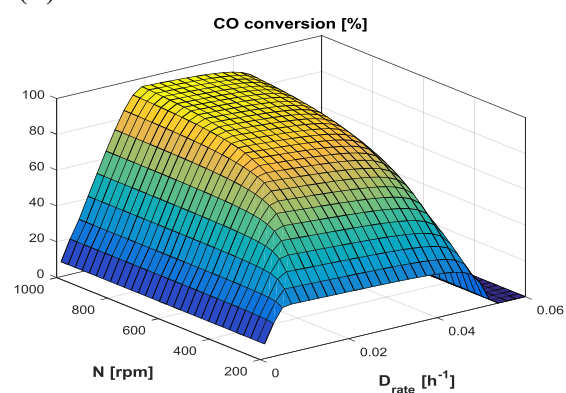

**Figure S3.** Steady-state ethanol productivity and CO conversion as function of agitation rate ( $N$ ) and liquid dilution rate ( $D_{rate}$ ): (A, B) with 90% cell recycle; (C, D) without cell recycle. Fixed conditions:  $y_{CO} = 0.65$ ,  $y_{H_2} = 0.2$ ,  $y_{CO_2} = 0.15$ ,  $GRT = 20$  min.

## Effects of dilution rate and gas residence time with H<sub>2</sub>-rich gas

(A)

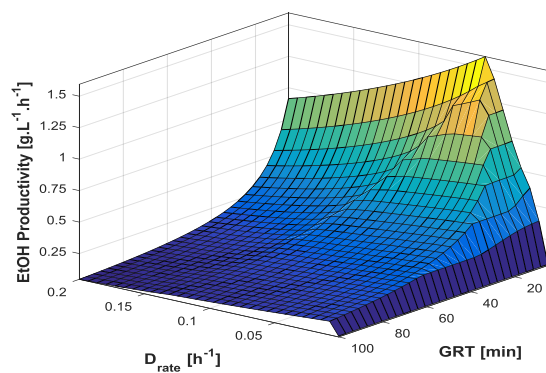

(B)

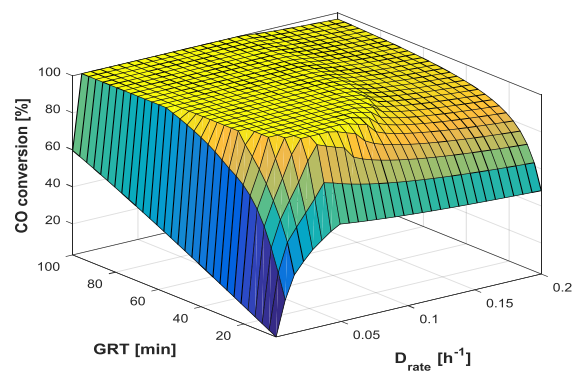

(C)

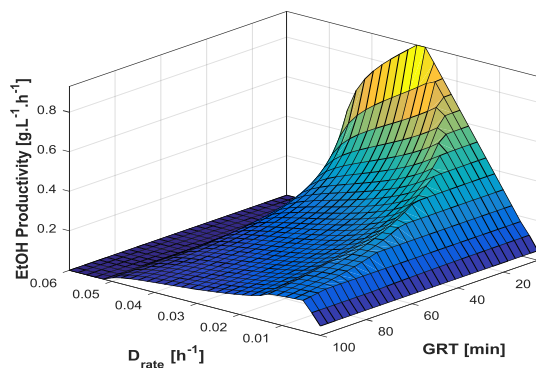

(D)

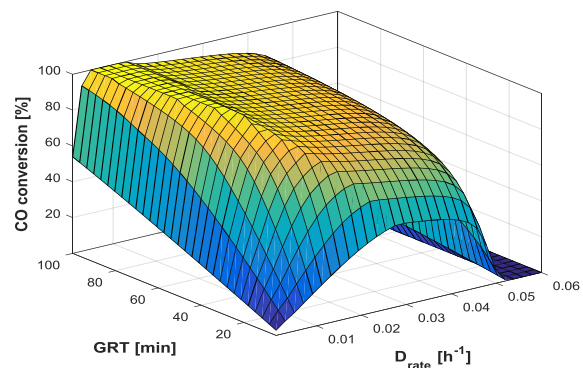

**Figure S4.** Steady-state ethanol productivity and CO conversion as function of gas residence time (*GRT*) and liquid dilution rate (*D<sub>rate</sub>*): (A, B) with 90% cell recycle; (C, D) without cell recycle. Fixed conditions:  $y_{CO} = 0.45$ ,  $y_{H_2} = 0.5$ ,  $y_{CO_2} = 0.05$ ,  $N = 500$  rpm. Note: the axes are rotated in (A) and (C).



## Optimization of process conditions and kinetic parameters

**Table S5. Minimum and maximum values of the decision variables at the Pareto-optimal solutions**

| Decision Variable                                  | 1 <sup>st</sup> run<br>(65% CO, 20% H <sub>2</sub> , 15% CO <sub>2</sub> ) |         | 2 <sup>nd</sup> run †<br>(45% CO, 50% H <sub>2</sub> , 5% CO <sub>2</sub> ) |         | 3 <sup>rd</sup> run † |         |
|----------------------------------------------------|----------------------------------------------------------------------------|---------|-----------------------------------------------------------------------------|---------|-----------------------|---------|
|                                                    | min                                                                        | max     | min                                                                         | max     | min                   | max     |
| <i>GRT</i>                                         | 5.45                                                                       | 49.8    | 8.22                                                                        | 32.7    | 7.79                  | 29.9    |
| <i>D<sub>rate</sub></i>                            | 0.0396                                                                     | 0.173   | 0.0456                                                                      | 0.0607  | 0.0465                | 0.0605  |
| <i>XP</i>                                          | 0.130                                                                      | 0.150   | 0.122                                                                       | 0.189   | 0.105                 | 0.351   |
| <i>H<sub>2</sub>:CO</i>                            | -                                                                          | -       | -                                                                           | -       | 0.778                 | 0.855   |
| <i>v<sub>max,CO</sub></i>                          | 42.8                                                                       | 45.3    | 43.7                                                                        | 45.0    | 38.5                  | 43.2    |
| <i>v<sub>max,H<sub>2</sub></sub></i>               | 34.3                                                                       | 36.6    | 33.3                                                                        | 36.1    | 32.4                  | 36.1    |
| <i>Y<sub>X,CO</sub></i>                            | 2.15                                                                       | 2.49    | 2.12                                                                        | 2.40    | 2.02                  | 2.40    |
| <i>Y<sub>X,H<sub>2</sub></sub></i>                 | 0.200                                                                      | 0.299   | 0.209                                                                       | 0.267   | 0.196                 | 0.289   |
| <i>v<sub>max,CO</sub><sup>AcR</sup></i>            | 39.0                                                                       | 42.1    | 31.8                                                                        | 33.3    | 33.9                  | 35.4    |
| <i>v<sub>max,H<sub>2</sub></sub><sup>AcR</sup></i> | 1.16                                                                       | 2.26    | 16.2                                                                        | 23.5    | 12.1                  | 17.5    |
| <i>K<sub>S,CO</sub><sup>AcR</sup></i>              | 362                                                                        | 365     | 398                                                                         | 428     | 397                   | 404     |
| <i>K<sub>S,H<sub>2</sub></sub><sup>AcR</sup></i>   | 471                                                                        | 488     | 403                                                                         | 485     | 358                   | 449     |
| <i>k<sub>d</sub></i>                               | 0.00637                                                                    | 0.00742 | 0.00564                                                                     | 0.00870 | 0.00518               | 0.00878 |

† All points achieved 100% CO conversion.

**Table S6. Selected solutions from the multi-objective optimization: 1st run (CO-rich gas)**

| <i>GRT</i> | <i>D<sub>rate</sub></i> | <i>XP</i> | <i>v<sub>max,CO</sub></i> | <i>v<sub>max,H<sub>2</sub></sub></i> | <i>Y<sub>X,CO</sub></i> | <i>Y<sub>X,H<sub>2</sub></sub></i> | <i>v<sub>max,H<sub>2</sub></sub><sup>AcR</sup></i> | <i>k<sub>d</sub></i> | EtOH Productivity | CO conversion |
|------------|-------------------------|-----------|---------------------------|--------------------------------------|-------------------------|------------------------------------|----------------------------------------------------|----------------------|-------------------|---------------|
| 49.8       | 0.173                   | 0.130     | 45.3                      | 36.6                                 | 2.44                    | 0.273                              | 1.54                                               | 0.00742              | 0.180             | 0.949         |
| 45.8       | 0.0505                  | 0.133     | 44.4                      | 35.7                                 | 2.43                    | 0.259                              | 1.49                                               | 0.00722              | 0.281             | 0.935         |
| 33.6       | 0.0574                  | 0.133     | 43.9                      | 35.8                                 | 2.42                    | 0.239                              | 1.51                                               | 0.00669              | 0.376             | 0.912         |
| 25.2       | 0.0407                  | 0.133     | 43.6                      | 35.9                                 | 2.38                    | 0.232                              | 1.45                                               | 0.00675              | 0.506             | 0.883         |
| 20.9       | 0.0404                  | 0.133     | 43.6                      | 35.7                                 | 2.40                    | 0.258                              | 1.40                                               | 0.00644              | 0.598             | 0.860         |
| 16.5       | 0.0404                  | 0.137     | 43.6                      | 35.5                                 | 2.41                    | 0.226                              | 1.21                                               | 0.00652              | 0.730             | 0.824         |
| 14.1       | 0.0438                  | 0.134     | 43.8                      | 35.0                                 | 2.39                    | 0.220                              | 1.20                                               | 0.00644              | 0.821             | 0.797         |
| 11.5       | 0.0401                  | 0.134     | 43.4                      | 35.4                                 | 2.41                    | 0.219                              | 1.31                                               | 0.00642              | 0.963             | 0.754         |
| 9.75       | 0.0397                  | 0.134     | 43.6                      | 35.5                                 | 2.40                    | 0.239                              | 1.24                                               | 0.00648              | 1.08              | 0.716         |
| 7.80       | 0.0417                  | 0.133     | 43.7                      | 34.4                                 | 2.38                    | 0.223                              | 1.82                                               | 0.00643              | 1.23              | 0.655         |
| 6.69       | 0.0411                  | 0.134     | 43.4                      | 34.8                                 | 2.41                    | 0.211                              | 1.31                                               | 0.00644              | 1.35              | 0.613         |
| 5.71       | 0.0490                  | 0.134     | 43.7                      | 35.5                                 | 2.30                    | 0.205                              | 1.45                                               | 0.00650              | 1.45              | 0.564         |

**Table S7. Selected solutions from the multi-objective optimization: 2<sup>nd</sup> run (H<sub>2</sub>-rich gas)**

| <i>GRT</i> | <i>D<sub>rate</sub></i> | <i>XP</i> | <i>v<sub>max,CO</sub></i> | <i>v<sub>max,H<sub>2</sub></sub></i> | <i>Y<sub>X,CO</sub></i> | <i>Y<sub>X,H<sub>2</sub></sub></i> | <i>v<sub>max,H<sub>2</sub></sub><sup>AcR</sup></i> | <i>k<sub>d</sub></i> | EtOH Productivity | CO conversion |
|------------|-------------------------|-----------|---------------------------|--------------------------------------|-------------------------|------------------------------------|----------------------------------------------------|----------------------|-------------------|---------------|
| 32.7       | 0.0519                  | 0.165     | 44.4                      | 33.9                                 | 2.30                    | 0.236                              | 22.4                                               | 0.00770              | 0.481             | 1.00          |
| 29.6       | 0.0505                  | 0.149     | 44.4                      | 33.9                                 | 2.29                    | 0.230                              | 21.7                                               | 0.00766              | 0.543             | 1.00          |
| 24.8       | 0.0535                  | 0.154     | 44.3                      | 34.0                                 | 2.28                    | 0.228                              | 21.4                                               | 0.00833              | 0.639             | 1.00          |
| 22.7       | 0.0534                  | 0.154     | 44.3                      | 34.5                                 | 2.29                    | 0.227                              | 21.1                                               | 0.00823              | 0.704             | 1.00          |
| 19.0       | 0.0527                  | 0.153     | 44.1                      | 34.0                                 | 2.30                    | 0.232                              | 21.3                                               | 0.00779              | 0.849             | 1.00          |
| 17.1       | 0.0537                  | 0.161     | 44.2                      | 34.0                                 | 2.30                    | 0.231                              | 20.3                                               | 0.00802              | 0.948             | 1.00          |
| 14.6       | 0.0607                  | 0.151     | 44.2                      | 34.1                                 | 2.22                    | 0.231                              | 23.5                                               | 0.00734              | 1.11              | 1.00          |
| 10.1       | 0.0534                  | 0.125     | 43.8                      | 34.2                                 | 2.26                    | 0.215                              | 19.7                                               | 0.00684              | 1.64              | 1.00          |
| 9.32       | 0.0566                  | 0.123     | 44.1                      | 34.6                                 | 2.32                    | 0.236                              | 18.2                                               | 0.00670              | 1.77              | 1.00          |
| 9.05       | 0.0562                  | 0.124     | 44.4                      | 35.9                                 | 2.35                    | 0.249                              | 18.7                                               | 0.00670              | 1.83              | 1.00          |
| 8.75       | 0.0559                  | 0.123     | 44.3                      | 35.3                                 | 2.39                    | 0.251                              | 17.3                                               | 0.00657              | 1.88              | 1.00          |
| 8.52       | 0.0570                  | 0.123     | 44.7                      | 35.8                                 | 2.39                    | 0.258                              | 17.1                                               | 0.00575              | 1.93              | 0.997         |

**Table S8. Selected solutions from the multi-objective optimization: 3<sup>rd</sup> run**

| <i>GRT</i> | <i>D<sub>rate</sub></i> | <i>XP</i> | H <sub>2</sub> :CO | <i>v<sub>max,CO</sub></i> | <i>v<sub>max,H<sub>2</sub></sub></i> | <i>Y<sub>X,CO</sub></i> | <i>Y<sub>X,H<sub>2</sub></sub></i> | <i>v<sub>max,H<sub>2</sub></sub><sup>AcR</sup></i> | <i>k<sub>d</sub></i> | EtOH Productivity | CO conversion |
|------------|-------------------------|-----------|--------------------|---------------------------|--------------------------------------|-------------------------|------------------------------------|----------------------------------------------------|----------------------|-------------------|---------------|
| 29.9       | 0.0465                  | 0.351     | 0.822              | 41.0                      | 34.2                                 | 2.02                    | 0.208                              | 17.5                                               | 0.00711              | 0.543             | 1.00          |
| 15.7       | 0.0517                  | 0.217     | 0.833              | 40.8                      | 32.4                                 | 2.18                    | 0.210                              | 16.1                                               | 0.00668              | 1.09              | 1.00          |
| 13.2       | 0.0497                  | 0.218     | 0.855              | 39.4                      | 35.8                                 | 2.36                    | 0.225                              | 17.3                                               | 0.00831              | 1.31              | 1.00          |
| 10.4       | 0.0542                  | 0.160     | 0.842              | 40.2                      | 34.2                                 | 2.11                    | 0.223                              | 17.2                                               | 0.00799              | 1.67              | 1.00          |
| 9.86       | 0.0528                  | 0.174     | 0.840              | 40.0                      | 34.2                                 | 2.30                    | 0.210                              | 16.8                                               | 0.00692              | 1.78              | 1.00          |
| 9.54       | 0.0572                  | 0.136     | 0.836              | 40.5                      | 33.8                                 | 2.20                    | 0.220                              | 16.5                                               | 0.00553              | 1.83              | 1.00          |
| 9.25       | 0.0568                  | 0.139     | 0.844              | 40.9                      | 34.0                                 | 2.20                    | 0.223                              | 16.5                                               | 0.00559              | 1.89              | 1.00          |
| 9.07       | 0.0580                  | 0.137     | 0.847              | 40.4                      | 34.1                                 | 2.21                    | 0.221                              | 16.3                                               | 0.00529              | 1.92              | 1.00          |
| 8.92       | 0.0584                  | 0.127     | 0.850              | 40.2                      | 34.6                                 | 2.26                    | 0.219                              | 16.4                                               | 0.00555              | 1.95              | 1.00          |
| 8.76       | 0.0591                  | 0.118     | 0.849              | 40.3                      | 35.0                                 | 2.36                    | 0.223                              | 16.8                                               | 0.00542              | 2.00              | 1.00          |
| 8.18       | 0.0603                  | 0.118     | 0.850              | 40.4                      | 34.8                                 | 2.36                    | 0.246                              | 16.7                                               | 0.00546              | 2.03              | 0.952         |
| 7.79       | 0.0605                  | 0.116     | 0.852              | 40.3                      | 35.5                                 | 2.21                    | 0.288                              | 16.6                                               | 0.00546              | 2.04              | 0.915         |

## Cell mass concentration

Figures S5-S8 show the ranges of cell mass concentration that correspond to the conditions presented in Figs. 5-8 from the main text.

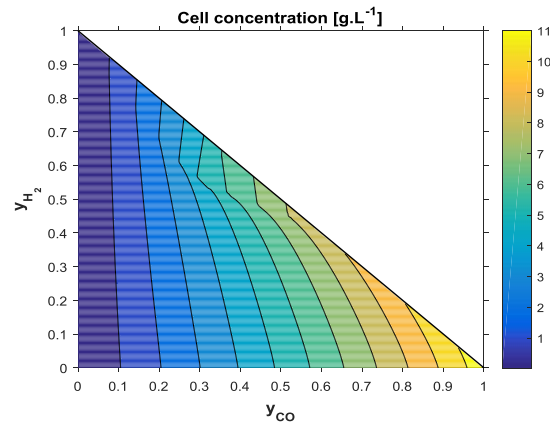

**Figure S5.** Predicted steady-state cell concentration achieved with different gas compositions ( $y_{CO_2} = 1 - y_{CO} - y_{H_2}$ ), with fixed conditions:  $GRT = 20$  min,  $D_{rate} = 0.025$  h<sup>-1</sup>,  $N = 500$  rpm, cell recycle = 90%.

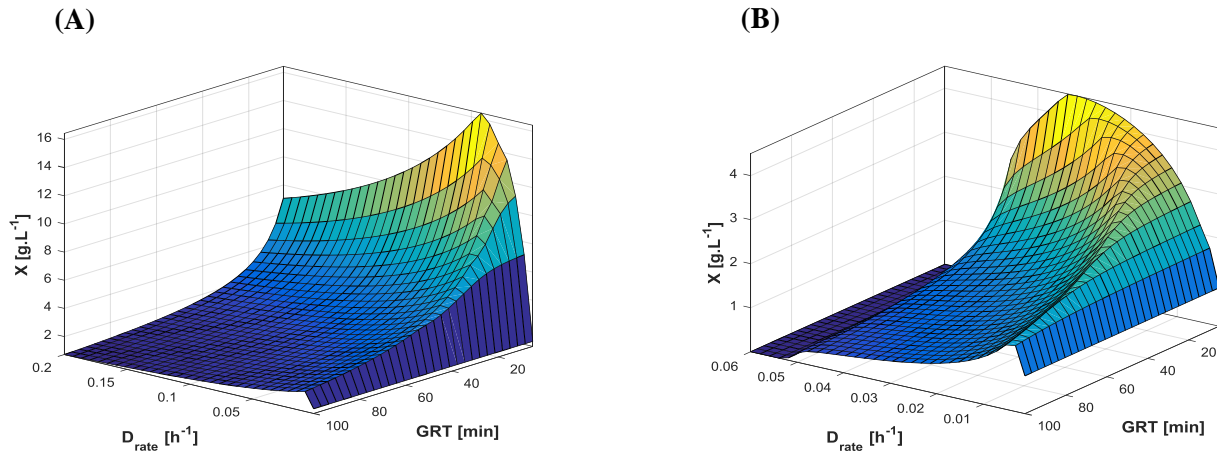

**Figure S6.** Steady-state cell mass concentration as function of gas residence time ( $GRT$ ) and liquid dilution rate ( $D_{rate}$ ): (A) with 90% cell recycle; (B) without cell recycle. Fixed conditions:  $y_{CO} = 0.65$ ,  $y_{H_2} = 0.2$ ,  $y_{CO_2} = 0.15$  and  $N = 500$  rpm.

**(A)**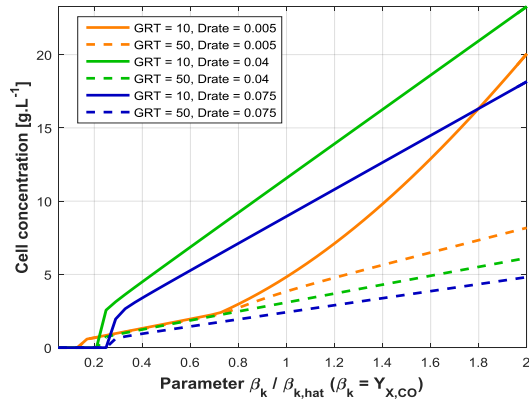**(B)**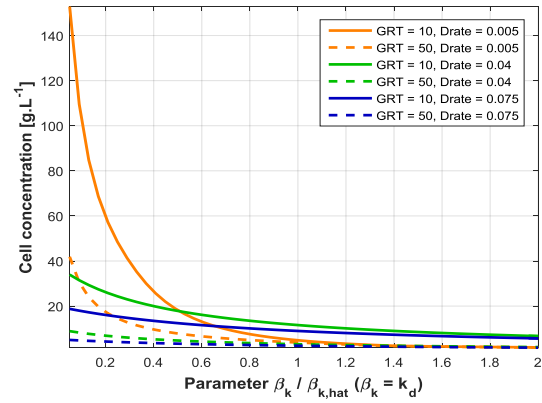

**Figure S7.** Sensitivity of steady-state cell mass concentration to kinetic parameters under different conditions of gas residence time ( $GRT$ ) and liquid dilution rate ( $D_{rate}$ ): (A) cell yield on CO ( $Y_{XCO}$ ); (B) cell death rate constant ( $k_d$ ). Fixed conditions:  $y_{CO} = 0.65$ ,  $y_{H_2} = 0.2$ ,  $y_{CO_2} = 0.15$  and  $N = 500$  rpm.

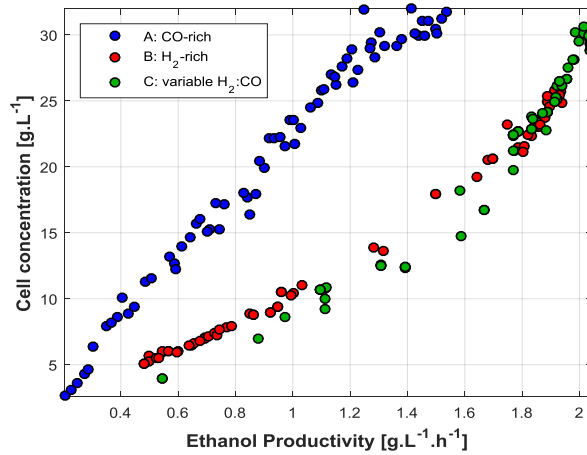

**Figure S8.** Values of cell mass concentration at the Pareto-optimal solutions obtained for maximization of steady-state ethanol productivity and CO conversion (see Fig. 8 of the main text). Colors indicate the optimization runs: (A) 1<sup>st</sup> run, with fixed CO-rich gas composition; (B) 2<sup>nd</sup> run, with fixed H<sub>2</sub>-rich gas composition; (C) 3<sup>rd</sup> run, with variable gas composition.

## References for the Supplementary Materials

Cussler, E. L. (1997). *Diffusion: Mass Transfer in Fluid Systems* (2<sup>nd</sup> ed.). New York: Cambridge University Press.

Himmelblau, D. M. (1970). *Process analysis by statistical methods*. New York: John Wiley & Sons, Inc.

Perry, R. H., Green, D. W. (1999). *Perry's chemical engineers' handbook* (7<sup>th</sup> ed.). McGraw-Hill.

Sander, R. (1999). *Compilation of Henry's law constants for inorganic and organic species of potential importance in environmental chemistry*.
